# Supplementary material for: Maternal transcription of non-protein coding RNAs from the PWS-critical region rescues growth retardation in mice
Source: PubMed Central journal article supplement (PMC4742849; doi:10.1038/srep20398), 2016-02-05
Supplement: srep20398-s1.pdf [file srep20398-s1.pdf]

## Supplementary information.

### **Maternal transcription of non-protein coding RNAs from the PWS-critical region rescues growth retardation in mice.**

Timofey S. Rozhdestvensky<sup>1,2\*</sup>, Thomas Robeck<sup>1,2</sup>, Chenna R. Galiveti<sup>1</sup>, Carsten A. Raabe<sup>1,3</sup>, Birte Seeger<sup>1,2</sup>, Anna Wolters<sup>1</sup>, Leonid V. Gubar<sup>1,2</sup>, Jürgen Brosius<sup>1,3</sup> and Boris V. Skryabin<sup>1,2\*</sup>.

<sup>1</sup>Institute of Experimental Pathology (ZMBE), University of Muenster, Von-Esmarch-Str. 56, D-48149 Münster, Germany.

<sup>2</sup>Department of Medicine (TRAM), University Hospital of Muenster, Von-Esmarch-Str. 56, D-48149 Münster, Germany.

<sup>3</sup>Institute of Evolutionary and Medical Genomics, Brandenburg Medical School (MHB), D-16816 Neuruppin, Germany

\*Corresponding author: Timofey S. Rozhdestvensky: [rozhdest@uni-muenster.de](mailto:rozhdest@uni-muenster.de); correspondence also can be addressed to Boris V. Skryabin: [skryabi@uni-muenster.de](mailto:skryabi@uni-muenster.de).

## Mouse PWS/AS locus (chromosome 7qC)

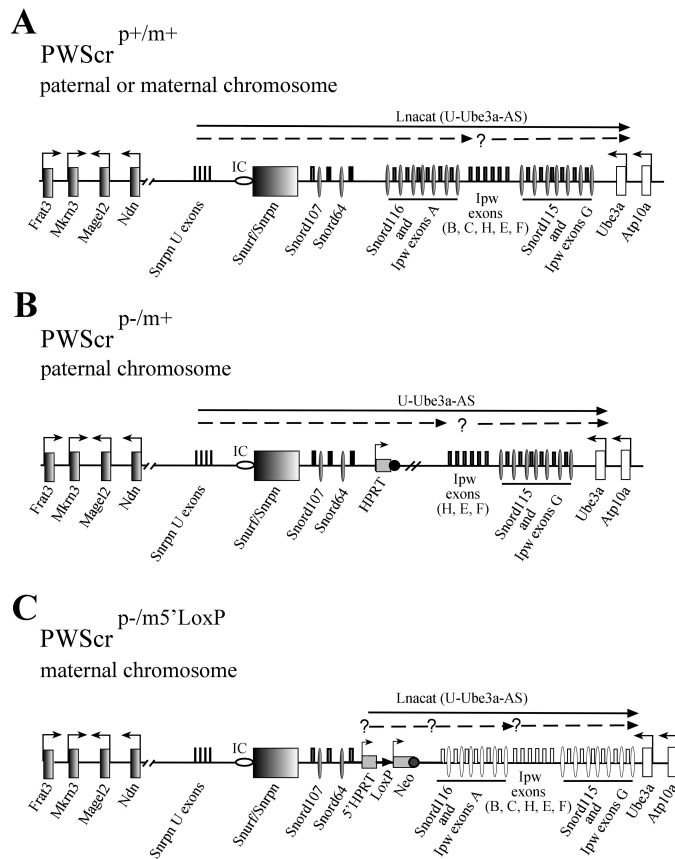

### Supplementary Figure 1. Schematic representation of the mouse PWS/AS locus in investigated mice.

(A) Schematic representation of the PWS/AS locus on paternal or maternal chromosome in wild type mice. (B) Schematic representation of the PWS/AS locus on the paternal chromosome in  $PWScr^{p^{-}/m^{+}}$  mice. (C) Schematic representation of the PWS/AS locus on maternal chromosome in  $PWScr^{p^{-}/m^{+}5'LoxP}$  mice. The PWS/AS locus on the paternal chromosome for this genotype is like on panel B. Drawing is not to scale. (A, B, C) Protein coding genes, snoRNAs and non-protein coding U-UBE3A-ATS exons are marked as boxes, ovals and bars, respectively. Paternally and maternally expressed genes in the PWS/AS locus are labelled black-grey and white, respectively. Known and predicted U-UBE3A-ATS transcripts are shown as black and dashed arrows, respectively. Question marks depict regions with possible internal initiation of transcription. The PWS imprinting centre (PWS-IC) is schematically indicated by a white oval and marked with IC.

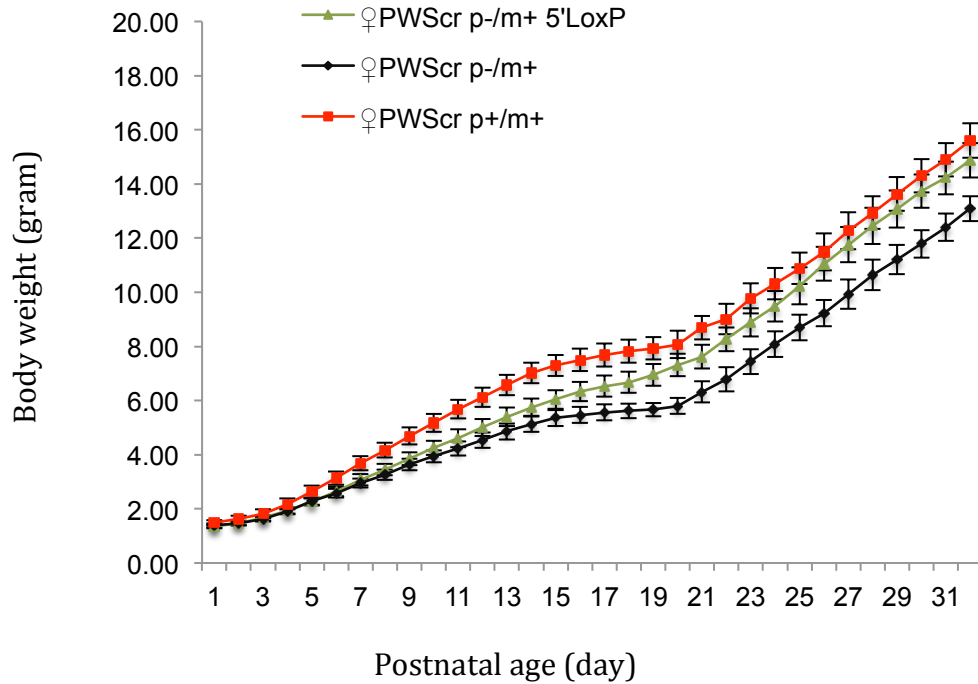

**Supplementary Figure 2. Growth dynamics of  $PWScr^{p-/m5'LoxP}$ ,  $PWScr^{p-/m+}$  and wild type female mice.**

The curves show the growth dynamics of 84 female mice. The red line corresponds to weight gain of 30 wild type mice. The yellow line corresponds to weight gain of 26  $PWScr^{p-/m5'LoxP}$  mice. The black line corresponds to weight gain of 28  $PWScr^{p-/m+}$  mice. Bars indicate standard deviation. Weights mean, observed standard deviation and confidence interval for each time point of investigated mice with the level of 95% are calculated in Supplementary Table 1.

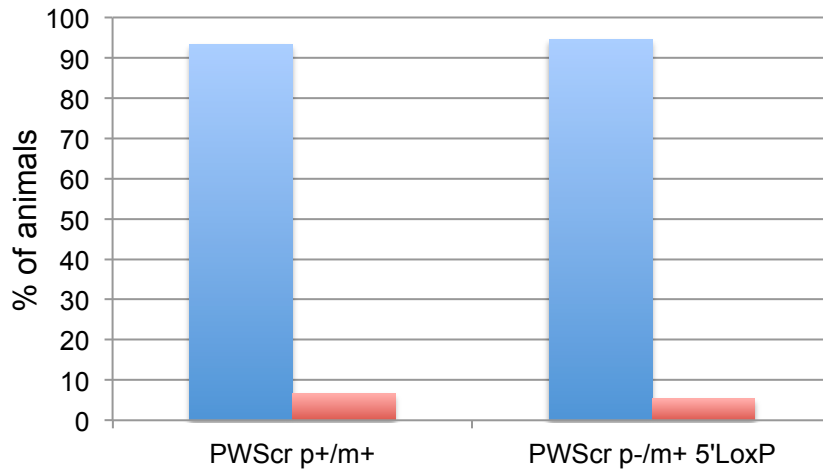

**Supplementary Figure 3.** Postnatal lethality of wild type *PWScr*<sup>p+/m+</sup> (n=60) and *PWScr*<sup>p-/m+ 5'LoxP</sup> (n=56) mice. Blue and red bars represent percentages of surviving and dead mice, respectively, after 60 days of observation.

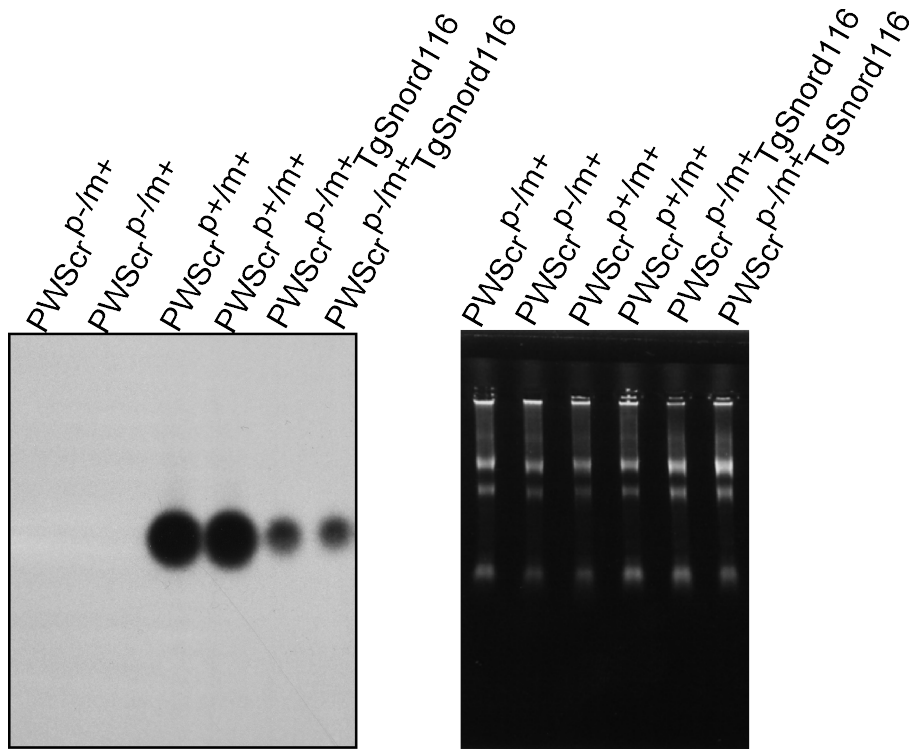

**Supplementary Figure 4.** Northern blot analyses of Snord116 in wild type, *PWScr<sup>p-/m+</sup>* and *PWScr<sup>p-/m+</sup>* TgSnord116 mice (left panel). Total RNA isolated from mouse brains was separated on a 1.2% denaturing agarose gel. An ethidium bromide-stained gel is shown as RNA loading control (right panel). Mouse genotypes are indicated on the top of each lane.

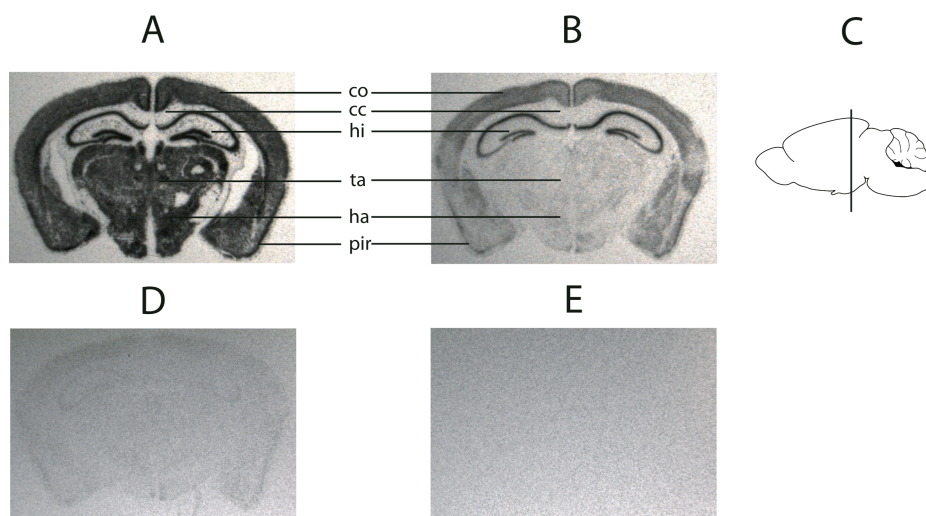

**Supplementary Figure 5. *In situ* hybridization of wild type and  $PWScr^{p-}$   $/m^{+}TgSnord116$  mouse sagittal brain sections.**

(A) Brain sections of wild type mice. It is identical to the section shown on Figure 5A of the main manuscript. (B) Brain sections of  $PWScr^{p-}$   $/m^{+}TgSnord116$  mice. (A, B) Mouse brain areas are denoted: cc: corpus callosum; co: cortex; ha: hypothalamic area; hi: hippocampus; ta: thalamic area; pir: piriformal cortex. (C) Schematic representation of the cutting in sagittal brain section. *In situ* hybridization was performed on floating 30 $\mu$ m brain sections as described in the main text. In case of  $PWScr^{p-}$   $/m^{+}TgSnord116$  mice TgSnord116 specific probe complementary to the exons of transgenic Snord116 RNA's host transcript (eGFP) was used. (D, E) Examples of ISH control experiments. (D) Brain section of  $PWScr^{p-}/m^{+}TgSnord116$  mice hybridized with eGFP sense probe. (E) Example of brain sections of wild type mice hybridized with eGFP antisense probe. (B, D, E) The exposure time was 4 days.

**Supplementary Table 1. Growth dynamics of *PWScr<sup>p-/m5'LoxP</sup>*, *PWScr<sup>p-/m+</sup>* and wild type mice.**

**Growth dynamics of *PWScr<sup>p-/m5'LoxP</sup>* male mice**

| <b>Postnatal age (days)</b> | <b><u>Weight mean (gram)</u></b> | <b><u>Standard deviation</u></b> | <b><u>Number of mice</u></b> | <b><u>A 95% Confidence interval</u></b> |
|-----------------------------|----------------------------------|----------------------------------|------------------------------|-----------------------------------------|
| 1                           | 1.43                             | 0.16                             | 27                           | 0.06                                    |
| 2                           | 1.56                             | 0.19                             | 28                           | 0.07                                    |
| 3                           | 1.75                             | 0.23                             | 30                           | 0.08                                    |
| 4                           | 2.02                             | 0.27                             | 30                           | 0.10                                    |
| 5                           | 2.40                             | 0.35                             | 30                           | 0.13                                    |
| 6                           | 2.78                             | 0.35                             | 30                           | 0.13                                    |
| 7                           | 3.19                             | 0.42                             | 30                           | 0.15                                    |
| 8                           | 3.62                             | 0.45                             | 30                           | 0.16                                    |
| 9                           | 4.06                             | 0.49                             | 30                           | 0.18                                    |
| 10                          | 4.45                             | 0.57                             | 30                           | 0.20                                    |
| 11                          | 4.92                             | 0.72                             | 30                           | 0.26                                    |
| 12                          | 5.22                             | 0.70                             | 30                           | 0.25                                    |
| 13                          | 5.59                             | 0.73                             | 30                           | 0.26                                    |
| 14                          | 5.95                             | 0.76                             | 30                           | 0.27                                    |
| 15                          | 6.23                             | 0.79                             | 30                           | 0.28                                    |
| 16                          | 6.52                             | 0.81                             | 30                           | 0.29                                    |
| 17                          | 6.70                             | 0.89                             | 30                           | 0.32                                    |
| 18                          | 6.89                             | 0.89                             | 30                           | 0.32                                    |
| 19                          | 7.18                             | 0.92                             | 30                           | 0.33                                    |
| 20                          | 7.63                             | 0.87                             | 30                           | 0.31                                    |
| 21                          | 8.11                             | 0.88                             | 30                           | 0.31                                    |
| 22                          | 8.60                             | 1.00                             | 30                           | 0.36                                    |
| 23                          | 9.38                             | 0.93                             | 30                           | 0.33                                    |
| 24                          | 10.18                            | 1.10                             | 30                           | 0.39                                    |
| 25                          | 10.98                            | 1.10                             | 30                           | 0.39                                    |
| 26                          | 11.82                            | 1.26                             | 30                           | 0.45                                    |
| 27                          | 12.80                            | 1.39                             | 30                           | 0.50                                    |
| 28                          | 13.73                            | 1.45                             | 30                           | 0.52                                    |
| 29                          | 14.73                            | 1.48                             | 30                           | 0.53                                    |
| 30                          | 15.75                            | 1.67                             | 30                           | 0.60                                    |
| 31                          | 16.63                            | 1.65                             | 30                           | 0.59                                    |
| 32                          | 17.66                            | 1.71                             | 30                           | 0.61                                    |
| 33                          | 18.50                            | 1.72                             | 30                           | 0.62                                    |
| 34                          | 19.10                            | 1.81                             | 30                           | 0.65                                    |
| 35                          | 19.68                            | 1.77                             | 30                           | 0.63                                    |
| 36                          | 19.93                            | 1.73                             | 30                           | 0.62                                    |
| 37                          | 20.16                            | 1.89                             | 30                           | 0.68                                    |

|    |       |      |    |      |
|----|-------|------|----|------|
| 38 | 20.69 | 1.78 | 30 | 0.64 |
| 39 | 21.11 | 1.85 | 30 | 0.66 |
| 40 | 21.40 | 1.86 | 30 | 0.67 |
| 41 | 21.56 | 1.83 | 30 | 0.65 |
| 42 | 22.10 | 1.89 | 30 | 0.68 |
| 43 | 22.27 | 1.75 | 30 | 0.63 |
| 44 | 22.41 | 1.96 | 30 | 0.70 |
| 45 | 22.82 | 1.80 | 30 | 0.64 |
| 46 | 23.17 | 1.87 | 30 | 0.67 |
| 47 | 23.33 | 1.77 | 30 | 0.63 |
| 48 | 23.70 | 1.81 | 30 | 0.65 |
| 49 | 23.81 | 1.77 | 26 | 0.68 |
| 50 | 24.05 | 1.81 | 26 | 0.70 |
| 51 | 24.18 | 1.81 | 26 | 0.70 |
| 52 | 24.45 | 1.81 | 26 | 0.70 |
| 53 | 24.53 | 1.81 | 26 | 0.70 |
| 54 | 24.70 | 1.89 | 26 | 0.73 |
| 55 | 24.93 | 2.05 | 26 | 0.79 |
| 56 | 24.97 | 2.12 | 26 | 0.82 |
| 57 | 25.14 | 1.87 | 26 | 0.72 |
| 58 | 25.34 | 2.06 | 26 | 0.79 |
| 59 | 25.54 | 2.01 | 26 | 0.77 |
| 60 | 25.69 | 1.92 | 26 | 0.74 |

### Growth dynamics of *PWScr<sup>D-/m5<sup>LoxP</sup></sup>* female mice

| <b>Postnatal age (days)</b> | <b><u>Weight mean (gram)</u></b> | <b><u>Standard deviation</u></b> | <b><u>Number of mice</u></b> | <b><u>A 95% Confidence interval</u></b> |
|-----------------------------|----------------------------------|----------------------------------|------------------------------|-----------------------------------------|
| 1                           | 1.35                             | 0.17                             | 26                           | 0.07                                    |
| 2                           | 1.47                             | 0.21                             | 26                           | 0.08                                    |
| 3                           | 1.67                             | 0.25                             | 26                           | 0.10                                    |
| 4                           | 1.94                             | 0.30                             | 26                           | 0.11                                    |
| 5                           | 2.26                             | 0.38                             | 26                           | 0.14                                    |
| 6                           | 2.64                             | 0.43                             | 26                           | 0.17                                    |
| 7                           | 3.07                             | 0.53                             | 26                           | 0.21                                    |
| 8                           | 3.45                             | 0.55                             | 26                           | 0.21                                    |
| 9                           | 3.85                             | 0.62                             | 26                           | 0.24                                    |
| 10                          | 4.25                             | 0.67                             | 26                           | 0.26                                    |
| 11                          | 4.61                             | 0.87                             | 26                           | 0.34                                    |
| 12                          | 5.00                             | 0.80                             | 26                           | 0.31                                    |



|    |       |      |    |      |
|----|-------|------|----|------|
| 13 | 5.40  | 0.88 | 26 | 0.34 |
| 14 | 5.74  | 0.86 | 26 | 0.33 |
| 15 | 6.04  | 0.92 | 26 | 0.35 |
| 16 | 6.34  | 0.95 | 26 | 0.36 |
| 17 | 6.53  | 1.01 | 26 | 0.39 |
| 18 | 6.67  | 1.00 | 26 | 0.39 |
| 19 | 6.94  | 1.04 | 26 | 0.40 |
| 20 | 7.31  | 1.07 | 26 | 0.41 |
| 21 | 7.62  | 1.14 | 26 | 0.44 |
| 22 | 8.26  | 1.14 | 26 | 0.44 |
| 23 | 8.89  | 1.37 | 26 | 0.53 |
| 24 | 9.48  | 1.46 | 26 | 0.56 |
| 25 | 10.24 | 1.76 | 26 | 0.68 |
| 26 | 11.05 | 1.61 | 26 | 0.62 |
| 27 | 11.75 | 1.70 | 26 | 0.65 |
| 28 | 12.45 | 1.76 | 26 | 0.67 |
| 29 | 13.08 | 1.78 | 26 | 0.69 |
| 30 | 13.74 | 1.62 | 26 | 0.62 |
| 31 | 14.22 | 1.60 | 26 | 0.61 |
| 32 | 14.87 | 1.65 | 26 | 0.63 |

### Growth dynamics of *PWScr<sup>D/m+</sup>* male mice

| <b>Postnatal age (days)</b> | <b><u>Weight mean (gram)</u></b> | <b><u>Standard deviation</u></b> | <b><u>Number of mice</u></b> | <b><u>A 95% Confidence interval</u></b> |
|-----------------------------|----------------------------------|----------------------------------|------------------------------|-----------------------------------------|
| 1                           | 1.46                             | 0.16                             | 22                           | 0.06                                    |
| 2                           | 1.55                             | 0.17                             | 22                           | 0.07                                    |
| 3                           | 1.71                             | 0.22                             | 22                           | 0.09                                    |
| 4                           | 2.03                             | 0.27                             | 23                           | 0.11                                    |
| 5                           | 2.40                             | 0.30                             | 23                           | 0.12                                    |
| 6                           | 2.77                             | 0.36                             | 23                           | 0.15                                    |
| 7                           | 3.16                             | 0.39                             | 23                           | 0.16                                    |
| 8                           | 3.52                             | 0.44                             | 23                           | 0.18                                    |
| 9                           | 3.88                             | 0.47                             | 23                           | 0.19                                    |
| 10                          | 4.15                             | 0.51                             | 23                           | 0.21                                    |
| 11                          | 4.47                             | 0.52                             | 23                           | 0.21                                    |
| 12                          | 4.76                             | 0.57                             | 23                           | 0.23                                    |
| 13                          | 5.03                             | 0.63                             | 23                           | 0.26                                    |
| 14                          | 5.40                             | 0.72                             | 23                           | 0.29                                    |
| 15                          | 5.57                             | 0.79                             | 23                           | 0.32                                    |
| 16                          | 5.67                             | 0.90                             | 23                           | 0.37                                    |
| 17                          | 5.80                             | 0.90                             | 23                           | 0.37                                    |

|    |       |      |    |      |
|----|-------|------|----|------|
| 18 | 5.84  | 0.88 | 23 | 0.36 |
| 19 | 5.94  | 0.79 | 23 | 0.32 |
| 20 | 6.04  | 0.84 | 23 | 0.34 |
| 21 | 6.60  | 1.06 | 23 | 0.43 |
| 22 | 7.24  | 1.15 | 23 | 0.47 |
| 23 | 8.14  | 1.06 | 22 | 0.44 |
| 24 | 8.79  | 1.20 | 22 | 0.50 |
| 25 | 9.54  | 1.12 | 22 | 0.47 |
| 26 | 10.20 | 1.04 | 19 | 0.47 |
| 27 | 11.28 | 1.13 | 19 | 0.51 |
| 28 | 12.06 | 0.98 | 18 | 0.45 |
| 29 | 12.79 | 1.11 | 18 | 0.51 |
| 30 | 13.92 | 0.94 | 18 | 0.43 |
| 31 | 14.77 | 1.04 | 18 | 0.48 |
| 32 | 15.51 | 0.85 | 16 | 0.42 |
| 33 | 16.63 | 0.71 | 16 | 0.35 |
| 34 | 17.36 | 0.64 | 16 | 0.31 |
| 35 | 17.70 | 0.58 | 16 | 0.28 |
| 36 | 18.17 | 0.64 | 16 | 0.32 |
| 37 | 18.81 | 0.59 | 16 | 0.29 |
| 38 | 19.06 | 0.56 | 16 | 0.27 |
| 39 | 19.36 | 0.55 | 16 | 0.27 |
| 40 | 19.56 | 0.60 | 16 | 0.29 |
| 41 | 19.80 | 0.58 | 16 | 0.28 |
| 42 | 19.96 | 0.68 | 16 | 0.33 |
| 43 | 20.31 | 0.69 | 16 | 0.34 |
| 44 | 20.43 | 0.69 | 16 | 0.34 |
| 45 | 20.75 | 0.76 | 16 | 0.37 |
| 46 | 20.97 | 0.82 | 16 | 0.40 |
| 47 | 21.07 | 0.80 | 16 | 0.39 |
| 48 | 21.37 | 0.97 | 16 | 0.47 |
| 49 | 21.52 | 0.97 | 16 | 0.48 |
| 50 | 21.66 | 0.85 | 16 | 0.42 |
| 51 | 21.91 | 0.84 | 16 | 0.41 |
| 52 | 22.26 | 1.03 | 16 | 0.50 |
| 53 | 22.38 | 0.93 | 16 | 0.45 |
| 54 | 22.47 | 1.02 | 16 | 0.50 |
| 55 | 22.75 | 0.98 | 16 | 0.48 |
| 56 | 22.78 | 1.02 | 16 | 0.50 |
| 57 | 23.07 | 1.02 | 16 | 0.50 |
| 58 | 23.30 | 1.07 | 16 | 0.53 |
| 59 | 23.34 | 1.07 | 16 | 0.52 |
| 60 | 23.30 | 1.16 | 16 | 0.57 |

## Growth dynamics of *PWScr<sup>D-/m+</sup>* female mice

| <b>Postnatal age (days)</b> | <b><u>Weight mean (gram)</u></b> | <b><u>Standard deviation</u></b> | <b><u>Number of mice</u></b> | <b><u>A 95% Confidence interval</u></b> |
|-----------------------------|----------------------------------|----------------------------------|------------------------------|-----------------------------------------|
| 1                           | 1.39                             | 0.17                             | 26                           | 0.07                                    |
| 2                           | 1.47                             | 0.20                             | 26                           | 0.08                                    |
| 3                           | 1.63                             | 0.25                             | 26                           | 0.10                                    |
| 4                           | 1.91                             | 0.30                             | 28                           | 0.11                                    |
| 5                           | 2.28                             | 0.39                             | 28                           | 0.14                                    |
| 6                           | 2.58                             | 0.43                             | 28                           | 0.16                                    |
| 7                           | 2.96                             | 0.46                             | 28                           | 0.17                                    |
| 8                           | 3.26                             | 0.55                             | 28                           | 0.20                                    |
| 9                           | 3.63                             | 0.57                             | 28                           | 0.21                                    |
| 10                          | 3.94                             | 0.60                             | 28                           | 0.22                                    |
| 11                          | 4.22                             | 0.69                             | 28                           | 0.26                                    |
| 12                          | 4.54                             | 0.78                             | 28                           | 0.29                                    |
| 13                          | 4.86                             | 0.80                             | 28                           | 0.30                                    |
| 14                          | 5.14                             | 0.82                             | 28                           | 0.30                                    |
| 15                          | 5.36                             | 0.80                             | 28                           | 0.30                                    |
| 16                          | 5.47                             | 0.81                             | 28                           | 0.30                                    |
| 17                          | 5.56                             | 0.78                             | 28                           | 0.29                                    |
| 18                          | 5.62                             | 0.73                             | 28                           | 0.27                                    |
| 19                          | 5.67                             | 0.69                             | 28                           | 0.25                                    |
| 20                          | 5.80                             | 0.79                             | 28                           | 0.29                                    |
| 21                          | 6.32                             | 1.04                             | 28                           | 0.39                                    |
| 22                          | 6.79                             | 1.21                             | 28                           | 0.45                                    |
| 23                          | 7.44                             | 1.24                             | 28                           | 0.46                                    |
| 24                          | 8.08                             | 1.28                             | 28                           | 0.48                                    |
| 25                          | 8.70                             | 1.29                             | 28                           | 0.48                                    |
| 26                          | 9.23                             | 1.30                             | 27                           | 0.49                                    |
| 27                          | 9.93                             | 1.42                             | 27                           | 0.54                                    |
| 28                          | 10.64                            | 1.42                             | 25                           | 0.56                                    |
| 29                          | 11.21                            | 1.38                             | 25                           | 0.54                                    |
| 30                          | 11.79                            | 1.29                             | 25                           | 0.51                                    |
| 31                          | 12.40                            | 1.28                             | 25                           | 0.50                                    |
| 32                          | 13.09                            | 1.14                             | 24                           | 0.46                                    |

## Growth dynamics of wild type (*PWScr<sup>p+/m+</sup>*) male mice

| <b>Postnatal age (days)</b> | <b><u>Weight mean (gram)</u></b> | <b><u>Standard deviation</u></b> | <b><u>Number of mice</u></b> | <b><u>A 95% Confidence interval</u></b> |
|-----------------------------|----------------------------------|----------------------------------|------------------------------|-----------------------------------------|
| 1                           | 1.43                             | 0.13                             | 24                           | 0.05                                    |
| 2                           | 1.55                             | 0.15                             | 24                           | 0.06                                    |
| 3                           | 1.77                             | 0.21                             | 24                           | 0.08                                    |
| 4                           | 2.14                             | 0.26                             | 28                           | 0.10                                    |
| 5                           | 2.56                             | 0.30                             | 28                           | 0.11                                    |
| 6                           | 3.03                             | 0.36                             | 28                           | 0.13                                    |
| 7                           | 3.54                             | 0.39                             | 28                           | 0.14                                    |
| 8                           | 4.20                             | 1.03                             | 28                           | 0.38                                    |
| 9                           | 4.64                             | 0.68                             | 28                           | 0.25                                    |
| 10                          | 5.04                             | 0.53                             | 28                           | 0.20                                    |
| 11                          | 5.47                             | 0.58                             | 28                           | 0.22                                    |
| 12                          | 5.94                             | 0.61                             | 28                           | 0.22                                    |
| 13                          | 6.36                             | 0.61                             | 28                           | 0.22                                    |
| 14                          | 6.79                             | 0.65                             | 28                           | 0.24                                    |
| 15                          | 7.13                             | 0.67                             | 28                           | 0.25                                    |
| 16                          | 7.41                             | 0.64                             | 28                           | 0.24                                    |
| 17                          | 7.53                             | 0.60                             | 28                           | 0.22                                    |
| 18                          | 7.69                             | 0.56                             | 28                           | 0.21                                    |
| 19                          | 7.85                             | 0.56                             | 28                           | 0.21                                    |
| 20                          | 8.14                             | 0.67                             | 28                           | 0.25                                    |
| 21                          | 8.88                             | 0.72                             | 28                           | 0.27                                    |
| 22                          | 9.32                             | 0.88                             | 28                           | 0.33                                    |
| 23                          | 10.07                            | 0.94                             | 28                           | 0.35                                    |
| 24                          | 10.92                            | 0.99                             | 28                           | 0.37                                    |
| 25                          | 11.66                            | 1.11                             | 28                           | 0.41                                    |
| 26                          | 12.49                            | 1.16                             | 27                           | 0.44                                    |
| 27                          | 13.47                            | 1.10                             | 27                           | 0.41                                    |
| 28                          | 14.35                            | 1.34                             | 23                           | 0.55                                    |
| 29                          | 15.19                            | 1.29                             | 23                           | 0.53                                    |
| 30                          | 16.34                            | 1.30                             | 23                           | 0.53                                    |
| 31                          | 16.93                            | 1.09                             | 23                           | 0.44                                    |
| 32                          | 18.03                            | 1.07                             | 22                           | 0.45                                    |
| 33                          | 18.99                            | 0.96                             | 22                           | 0.40                                    |
| 34                          | 19.60                            | 0.99                             | 22                           | 0.41                                    |
| 35                          | 19.83                            | 1.08                             | 22                           | 0.45                                    |
| 36                          | 20.42                            | 1.15                             | 22                           | 0.48                                    |
| 37                          | 20.83                            | 1.07                             | 22                           | 0.45                                    |
| 38                          | 20.94                            | 1.06                             | 22                           | 0.44                                    |
| 39                          | 21.28                            | 0.89                             | 22                           | 0.37                                    |
| 40                          | 21.36                            | 0.93                             | 22                           | 0.39                                    |

|    |       |      |    |      |
|----|-------|------|----|------|
| 41 | 21.62 | 1.01 | 22 | 0.42 |
| 42 | 21.99 | 1.07 | 22 | 0.45 |
| 43 | 22.22 | 1.00 | 22 | 0.42 |
| 44 | 22.53 | 0.95 | 22 | 0.40 |
| 45 | 22.73 | 1.10 | 22 | 0.46 |
| 46 | 22.86 | 1.01 | 22 | 0.42 |
| 47 | 23.18 | 1.03 | 22 | 0.43 |
| 48 | 23.33 | 1.09 | 22 | 0.46 |
| 49 | 23.49 | 1.09 | 22 | 0.45 |
| 50 | 23.76 | 1.15 | 22 | 0.48 |
| 51 | 23.93 | 1.08 | 22 | 0.45 |
| 52 | 24.11 | 1.09 | 22 | 0.46 |
| 53 | 24.41 | 1.16 | 22 | 0.49 |
| 54 | 24.38 | 1.21 | 22 | 0.51 |
| 55 | 24.36 | 1.41 | 22 | 0.59 |
| 56 | 24.80 | 1.13 | 22 | 0.47 |
| 57 | 24.94 | 1.22 | 22 | 0.51 |
| 58 | 25.27 | 1.26 | 22 | 0.53 |
| 59 | 25.25 | 1.21 | 22 | 0.51 |
| 60 | 25.25 | 1.19 | 22 | 0.50 |

**Growth dynamics of wild type ( $PWScr^{p+/m+}$ ) female mice**

| <b>Postnatal age (days)</b> | <b><u>Weight mean (gram)</u></b> | <b><u>Standard deviation</u></b> | <b><u>Number of mice</u></b> | <b><u>A 95% Confidence interval</u></b> |
|-----------------------------|----------------------------------|----------------------------------|------------------------------|-----------------------------------------|
| 1                           | 1.49                             | 0.25                             | 30                           | 0.09                                    |
| 2                           | 1.62                             | 0.34                             | 30                           | 0.12                                    |
| 3                           | 1.82                             | 0.44                             | 30                           | 0.16                                    |
| 4                           | 2.18                             | 0.56                             | 30                           | 0.20                                    |
| 5                           | 2.64                             | 0.63                             | 30                           | 0.23                                    |
| 6                           | 3.14                             | 0.69                             | 30                           | 0.25                                    |
| 7                           | 3.68                             | 0.72                             | 30                           | 0.26                                    |
| 8                           | 4.17                             | 0.79                             | 30                           | 0.28                                    |
| 9                           | 4.69                             | 0.88                             | 30                           | 0.31                                    |
| 10                          | 5.17                             | 0.91                             | 30                           | 0.33                                    |
| 11                          | 5.68                             | 0.94                             | 30                           | 0.34                                    |
| 12                          | 6.12                             | 1.02                             | 30                           | 0.36                                    |
| 13                          | 6.57                             | 1.03                             | 30                           | 0.37                                    |
| 14                          | 7.02                             | 1.05                             | 30                           | 0.38                                    |
| 15                          | 7.30                             | 1.10                             | 30                           | 0.39                                    |

|    |       |      |    |      |
|----|-------|------|----|------|
| 16 | 7.50  | 1.16 | 30 | 0.42 |
| 17 | 7.68  | 1.20 | 30 | 0.43 |
| 18 | 7.83  | 1.20 | 30 | 0.43 |
| 19 | 7.93  | 1.15 | 30 | 0.41 |
| 20 | 8.07  | 1.39 | 30 | 0.50 |
| 21 | 8.69  | 1.21 | 30 | 0.43 |
| 22 | 9.01  | 1.56 | 30 | 0.56 |
| 23 | 9.77  | 1.58 | 30 | 0.56 |
| 24 | 10.31 | 1.63 | 30 | 0.58 |
| 25 | 10.88 | 1.61 | 30 | 0.58 |
| 26 | 11.49 | 1.73 | 25 | 0.68 |
| 27 | 12.27 | 1.72 | 25 | 0.68 |
| 28 | 12.94 | 1.57 | 25 | 0.61 |
| 29 | 13.63 | 1.57 | 25 | 0.62 |
| 30 | 14.30 | 1.55 | 25 | 0.61 |
| 31 | 14.89 | 1.58 | 25 | 0.62 |
| 32 | 15.61 | 1.56 | 23 | 0.64 |

**Supplementary Table 2. RT-qPCR analyses of genes expression from the PWS-locus**

| Transcript Name | Genotype | Ave Cq      | StDev (test gene) | Ave Cq    | StDev  | $\Delta Cq$ | StDev | $\Delta\Delta Cq$ | $2^{-\Delta\Delta Cq}$ | $2^{-\Delta\Delta Cq}$ | $2^{-\Delta\Delta Cq}$ |
|-----------------|----------|-------------|-------------------|-----------|--------|-------------|-------|-------------------|------------------------|------------------------|------------------------|
|                 |          | (test gene) | (control)         | (control) | +StDev |             |       |                   |                        | -StDev                 |                        |
| Frat3           | WT       | 28.61       | 0.06              | 21.66     | 0.02   | 6.95        | 0.03  | 0.00              | 1.00                   | 1.03                   | 0.97                   |
|                 | KO       | 28.82       | 0.08              | 21.81     | 0.03   | 7.01        | 0.04  | -0.06             | 1.04                   | 1.08                   | 1.00                   |
|                 | LoxP     | 29.28       | 0.05              | 22.07     | 0.03   | 7.21        | 0.03  | -0.26             | 1.19                   | 1.22                   | 1.17                   |
| Mkrn3           | WT       | 26.88       | 0.05              | 21.66     | 0.02   | 5.22        | 0.03  | 0.00              | 1.00                   | 1.03                   | 0.97                   |
|                 | KO       | 26.85       | 0.05              | 21.81     | 0.03   | 5.04        | 0.03  | 0.18              | 0.88                   | 0.91                   | 0.85                   |
|                 | LoxP     | 27.41       | 0.07              | 22.07     | 0.03   | 5.34        | 0.04  | -0.11             | 1.08                   | 1.12                   | 1.05                   |
| Magel2          | WT       | 26.96       | 0.07              | 21.66     | 0.02   | 5.31        | 0.04  | 0.00              | 1.00                   | 1.04                   | 0.96                   |
|                 | KO       | 27.24       | 0.06              | 21.81     | 0.03   | 5.43        | 0.03  | -0.12             | 1.09                   | 1.12                   | 1.06                   |
|                 | LoxP     | 27.82       | 0.05              | 22.07     | 0.03   | 5.75        | 0.03  | -0.44             | 1.36                   | 1.39                   | 1.33                   |
| Ndn             | WT       | 20.54       | 0.01              | 21.66     | 0.02   | -1.12       | 0.01  | 0.00              | 1.00                   | 1.01                   | 0.99                   |
|                 | KO       | 20.74       | 0.03              | 21.81     | 0.03   | -1.07       | 0.02  | -0.05             | 1.03                   | 1.06                   | 1.01                   |
|                 | LoxP     | 21.06       | 0.02              | 22.07     | 0.03   | -1.01       | 0.01  | -0.11             | 1.08                   | 1.09                   | 1.06                   |
| Snrpn_exon_U1   | WT       | 23.74       | 0.03              | 21.66     | 0.02   | 2.09        | 0.02  | 0.00              | 1.00                   | 1.02                   | 0.98                   |
|                 | KO       | 23.93       | 0.03              | 21.81     | 0.03   | 2.12        | 0.02  | -0.03             | 1.02                   | 1.04                   | 1.00                   |
|                 | LoxP     | 24.24       | 0.04              | 22.07     | 0.03   | 2.16        | 0.03  | -0.07             | 1.05                   | 1.08                   | 1.03                   |
| Snrpn/snurf     | WT       | 19.23       | 0.04              | 21.66     | 0.02   | -2.43       | 0.02  | 0.00              | 1.00                   | 1.02                   | 0.98                   |
|                 | KO       | 19.34       | 0.01              | 21.81     | 0.03   | -2.47       | 0.02  | 0.04              | 0.97                   | 0.99                   | 0.96                   |
|                 | LoxP     | 19.55       | 0.06              | 22.07     | 0.03   | -2.53       | 0.03  | 0.10              | 0.93                   | 0.97                   | 0.90                   |
| Snurf assay     | WT       | 21.37       | 0.04              | 21.66     | 0.02   | -0.29       | 0.02  | 0.00              | 1.00                   | 1.02                   | 0.98                   |
|                 | KO       | 21.50       | 0.01              | 21.81     | 0.03   | -0.31       | 0.01  | 0.02              | 0.99                   | 1.00                   | 0.97                   |
|                 | LoxP     | 21.68       | 0.03              | 22.07     | 0.03   | -0.40       | 0.02  | 0.11              | 0.93                   | 0.94                   | 0.91                   |
| Snord64         | WT       | 24.17       | 0.05              | 21.66     | 0.02   | 2.51        | 0.03  | 0.00              | 1.00                   | 1.03                   | 0.97                   |
|                 | KO       | 24.72       | 0.04              | 21.81     | 0.03   | 2.91        | 0.03  | -0.39             | 1.31                   | 1.34                   | 1.29                   |
|                 | LoxP     | 24.94       | 0.04              | 22.07     | 0.03   | 2.86        | 0.02  | -0.35             | 1.27                   | 1.30                   | 1.25                   |

| Transcript Name | Genotype | Ave Cq      | StDev (test gene) | Ave Cq    | StDev  | $\Delta Cq$ | StDev | $\Delta\Delta Cq$ | $2^{-\Delta\Delta Cq}$ | $2^{-\Delta\Delta Cq}$ | $2^{-\Delta\Delta Cq}$ |
|-----------------|----------|-------------|-------------------|-----------|--------|-------------|-------|-------------------|------------------------|------------------------|------------------------|
|                 |          | (test gene) | (control)         | (control) | +StDev |             |       |                   |                        | -StDev                 |                        |
| IPW             | WT       | 26.77       | 0.09              | 21.66     | 0.02   | 5.11        | 0.05  | 0.00              | 1.00                   | 1.05                   | 0.95                   |
|                 | KO       | -           | -                 | -         | -      | -           | -     | -                 | -                      | -                      | -                      |
|                 | LoxP     | 30.63       | 0.12              | 22.07     | 0.03   | 8.56        | 0.06  | -3.44             | 10.89                  | 10.95                  | 10.83                  |
| IPW_exon_A1     | WT       | 24.32       | 0.10              | 21.66     | 0.02   | 2.66        | 0.05  | 0.00              | 1.00                   | 1.05                   | 0.95                   |
|                 | KO       | 0.00        | 0.00              | 0.00      | 0.00   | 0.00        | 0.00  | 0.00              | 0.00                   | 0.00                   | 0.00                   |
|                 | LoxP     | 28.15       | 0.17              | 22.07     | 0.03   | 6.07        | 0.09  | -3.41             | 10.63                  | 10.72                  | 10.54                  |
| Snord116        | WT       | 21.43       | 0.02              | 21.66     | 0.02   | -0.23       | 0.02  | 0.00              | 1.00                   | 1.02                   | 0.98                   |
|                 | KO       | -           | -                 | -         | -      | -           | -     | -                 | -                      | -                      | -                      |
|                 | LoxP     | 24.77       | 0.02              | 22.07     | 0.03   | 2.70        | 0.01  | -2.92             | 7.59                   | 7.61                   | 7.58                   |
| IPW_exon_A2     | WT       | 22.81       | 0.07              | 21.66     | 0.02   | 1.16        | 0.04  | 0.00              | 1.00                   | 1.04                   | 0.96                   |
|                 | KO       | 0.00        | 0.00              | 0.00      | 0.00   | 0.00        | 0.00  | 0.00              | 0.00                   | 0.00                   | 0.00                   |
|                 | LoxP     | 25.90       | 0.14              | 22.07     | 0.03   | 3.83        | 0.07  | -2.67             | 6.38                   | 6.46                   | 6.31                   |
| IPW_exon_B      | WT       | 26.26       | 0.05              | 21.66     | 0.02   | 4.60        | 0.03  | 0.00              | 1.00                   | 1.03                   | 0.97                   |
|                 | KO       | -           | -                 | -         | -      | -           | -     | -                 | -                      | -                      | -                      |
|                 | LoxP     | 30.28       | 0.21              | 22.07     | 0.03   | 8.20        | 0.11  | -3.60             | 12.11                  | 12.21                  | 12.00                  |
| IPW_exon_F      | WT       | 29.47       | 0.10              | 21.66     | 0.02   | 7.81        | 0.05  | 0.00              | 1.00                   | 1.05                   | 0.95                   |
|                 | KO       | 33.24       | 0.35              | 21.81     | 0.03   | 11.43       | 0.18  | -3.62             | 12.30                  | 12.48                  | 12.12                  |
|                 | LoxP     | 33.33       | 0.41              | 22.07     | 0.03   | 11.26       | 0.20  | -3.45             | 10.90                  | 11.11                  | 10.70                  |
| IPW_exon_G      | WT       | 23.20       | 0.05              | 21.66     | 0.02   | 1.55        | 0.03  | 0.00              | 1.00                   | 1.03                   | 0.97                   |
|                 | KO       | 25.30       | 0.09              | 21.81     | 0.03   | 3.49        | 0.05  | -1.94             | 3.84                   | 3.89                   | 3.80                   |
|                 | LoxP     | 25.63       | 0.08              | 22.07     | 0.03   | 3.56        | 0.04  | -2.01             | 4.02                   | 4.06                   | 3.98                   |
| Snord115        | WT       | 20.96       | 0.02              | 21.66     | 0.02   | -0.70       | 0.01  | 0.00              | 1.00                   | 1.01                   | 0.99                   |
|                 | KO       | 22.11       | 0.01              | 21.81     | 0.03   | 0.30        | 0.02  | -1.00             | 2.00                   | 2.01                   | 1.98                   |
|                 | LoxP     | 21.97       | 0.04              | 22.07     | 0.03   | -0.10       | 0.03  | -0.59             | 1.51                   | 1.53                   | 1.48                   |



| Transcript Name | Genotype | Ave Cq      | StDev (test gene) | Ave Cq    | StDev  | $\Delta Cq$ | StDev | $\Delta\Delta Cq$ | $2^{-\Delta\Delta Cq}$ | $2^{-\Delta\Delta Cq}$ | $2^{-\Delta\Delta Cq}$ |
|-----------------|----------|-------------|-------------------|-----------|--------|-------------|-------|-------------------|------------------------|------------------------|------------------------|
|                 |          | (test gene) | (control)         | (control) | +StDev |             |       |                   |                        | -StDev                 |                        |
| Ube3a_AS_b      | WT       | 29.06       | 0.12              | 21.66     | 0.02   | 7.40        | 0.06  | 0.00              | 1.00                   | 1.06                   | 0.94                   |
|                 | KO       | 29.59       | 0.12              | 21.81     | 0.03   | 7.78        | 0.06  | -0.38             | 1.30                   | 1.36                   | 1.24                   |
|                 | LoxP     | 30.32       | 0.14              | 22.07     | 0.03   | 8.25        | 0.07  | -0.84             | 1.79                   | 1.86                   | 1.72                   |
| Ube3a_AS_a      | WT       | 29.75       | 0.08              | 21.66     | 0.02   | 8.09        | 0.04  | 0.00              | 1.00                   | 1.04                   | 0.96                   |
|                 | KO       | 30.65       | 0.17              | 21.81     | 0.03   | 8.84        | 0.09  | -0.75             | 1.68                   | 1.77                   | 1.59                   |
|                 | LoxP     | 31.41       | 0.11              | 22.07     | 0.03   | 9.33        | 0.06  | -1.24             | 2.36                   | 2.42                   | 2.30                   |
| Ube3a_long      | WT       | 24.00       | 0.02              | 21.66     | 0.02   | 2.34        | 0.02  | 0.00              | 1.00                   | 1.02                   | 0.98                   |
|                 | KO       | 23.66       | 0.05              | 21.81     | 0.03   | 1.85        | 0.03  | 0.50              | 0.71                   | 0.74                   | 0.68                   |
|                 | LoxP     | 23.83       | 0.04              | 22.07     | 0.03   | 1.75        | 0.02  | 0.59              | 0.66                   | 0.69                   | 0.64                   |
| Ube3a_all       | WT       | 23.70       | 0.08              | 21.66     | 0.02   | 2.05        | 0.04  | 0.00              | 1.00                   | 1.04                   | 0.96                   |
|                 | KO       | 23.47       | 0.06              | 21.81     | 0.03   | 1.66        | 0.03  | 0.39              | 0.76                   | 0.80                   | 0.73                   |
|                 | LoxP     | 23.53       | 0.01              | 22.07     | 0.03   | 1.46        | 0.01  | 0.59              | 0.66                   | 0.68                   | 0.65                   |
| Ube3a_13        | WT       | 25.06       | 0.05              | 21.66     | 0.02   | 3.40        | 0.03  | 0.00              | 1.00                   | 1.03                   | 0.97                   |
|                 | KO       | 25.02       | 0.03              | 21.81     | 0.03   | 3.21        | 0.02  | 0.20              | 0.87                   | 0.89                   | 0.85                   |
|                 | LoxP     | 25.08       | 0.07              | 22.07     | 0.03   | 3.00        | 0.04  | 0.40              | 0.76                   | 0.79                   | 0.72                   |
| Atp10a          | WT       | 30.68       | 0.15              | 21.66     | 0.02   | 9.02        | 0.08  | 0.00              | 1.00                   | 1.08                   | 0.92                   |
|                 | KO       | 30.58       | 0.10              | 21.81     | 0.03   | 8.77        | 0.05  | 0.25              | 0.84                   | 0.89                   | 0.79                   |
|                 | LoxP     | 31.37       | 0.29              | 22.07     | 0.03   | 9.30        | 0.14  | -0.28             | 1.21                   | 1.36                   | 1.07                   |

### Supplementary Table 3: Details of oligonucleotides and hybridization probes used in this study

| Used symbol   | Name                                                             | Accession no. | Primer sequences for RT-qPCR                                              | amplicon size (bp) |
|---------------|------------------------------------------------------------------|---------------|---------------------------------------------------------------------------|--------------------|
| Frat3 (Peg12) | Paternally expressed 12                                          |               | Forward: GTGACTGCATTCCACCTTTTC<br>Reverse: AGCGTCACCCCACTTGAGTA           | 60                 |
| Mkrn3         | Makorin ring finger protein 3                                    |               | Forward: GCCATTGCGGCAAGACTA<br>Reverse: TTCTTCTCAAGTGTAAGCGATCC           | 61                 |
| Magel 2       | Melanoma antigen, family L, 2                                    |               | Forward: CTCCAAGGCACTGCAAACCT<br>Reverse: GCTGCACTGAAGGCAGTTCT            | 80                 |
| Ndn           | Neccdin                                                          |               | Forward: CAGAGAGGGTGCGGTCTG<br>Reverse: CTCCGAAGGTGGAGTGCTT               | 74                 |
| Snrpn_exon_1  | Small nuclear Ribonucleoprotein N                                |               | Forward: TGCATTGGACAATATTCCTGTAG<br>Reverse: GCTCAGTGAGGCTGTCCTTC         | 123                |
| Snurf assay   | SNRPN upstream reading frame                                     |               | Forward: GCCATTGCGGCAAGACTA<br>Reverse: TTCTTCTCAAGTGTAAGCGATCC           | 119                |
| Snrpn/Snurf   | Small nuclear Ribonucleoprotein N / SNRPN upstream reading frame |               | Forward: GGGCCCACTCCTAAAGATA<br>Reverse: CCTCTGCCAGCTGCTCTT               | 60                 |
| Snord64       | Small nuclear C/D box RNA 64                                     |               | Forward: ACTTATGATGAGCTATGTTTACTG<br>Reverse: CTTTCAAGTAATCATTGAGC        | 62                 |
| IPW exons     | IPW exons before snoRD116 cluster                                |               | Forward: TGCCCTAGGTCACCTTGAGTAAA<br>Reverse: GGGGTTTACTGGTAGCTCATTC       | 131                |
| IPW_exon_A1   | IPW exons between snoRD116 cluster                               |               | Forward: GTCCATGGAAAACATGCAGA<br>Reverse: ATGGAGACTCGGTTGGATGA            | 75                 |
| Snord116      | Small nucleolar RNA, C/D box 116                                 |               | Forward: TGATTCCCAGTCAAACATTCCT<br>Reverse: ACCTCAGTTCCGATGAGAGT          | 82                 |
| IPW_exon_A2   | IPW exons between snoRD116 cluster                               |               | Forward: GCATTCCCTTTCCAGTATGGT<br>Reverse: TCGGTTGGACGACATAAACA           | 86                 |
| IPW_exon_B    | IPW exons immediately after snoRD116 cluster                     |               | Forward: ACATCCAGAGAAAGTGTCACCA<br>Reverse: GGGTTTACTGGTAGCTCATTACG       | 71                 |
| IPW_exon_F    | IPW exons after snoRD116 cluster                                 |               | Forward: CCATCTAAAATATTTTCGACCCTGC<br>Reverse: GCTTCAGAGTTAGGAATGGTCAC    | 65                 |
| IPW_exon_G    | IPW exons after snoRD116 cluster                                 |               | Forward: GAAGACATTCTTCCAAGTATCAAG<br>Reverse: ATGGAAGTGGAGAGGGATTG        | 84                 |
| Snord115      | small nucleolar RNA, C/D box 115                                 |               | Forward: GGTCATGATGACAACCCAATG<br>Reverse: GCCTCAGCGTAATCCTATTGA          | 76                 |
| UBE3A-AS_b    | UBE3A antisense region                                           |               | Forward: TTGTATACAGGAAGCTAATGGGG<br>Reverse: CAAAAGTTTACAAATAAATAATGTTCC  | 157                |
| UBE3A-AS_a    | UBE3A antisense region                                           |               | Forward: ATCCATTCCACTAGTGTGTTGCT<br>Reverse: GCCAACATGTAGCCTCTATATACTC    | 76                 |
| UBE3A_long    | UBE3A                                                            |               | Forward: CTATACGAGGGAATCTGTTGTGATT<br>Reverse: CCTAGTCCTCCAACAGGTGCT      | 126                |
| UBE3A_all     | UBE3A                                                            |               | Forward: GAATCACTGTTCTTTACAGCCTAGTTC<br>Reverse: GGATTTTCCATAGCAATCATCTCT | 127                |
| UBE3A_1_3     | UBE3A                                                            |               | Forward: AGGGCGACAAGGACCAGT<br>Reverse: TTCGGCTAGCTTCAATGTCC              | 113                |
| ATP10a        | Phospholipid-transporting ATPase VA                              |               | Forward: CGCCTGGAGACGAACTTG<br>Reverse: TTCCTGAAGGCGGTCTTCTAT             | 60                 |

| Used symbol | Name                              | Accession no. | Primer sequences methylation qPCR analysis                         | amplicon size (bp) |
|-------------|-----------------------------------|---------------|--------------------------------------------------------------------|--------------------|
| Snrpn       | Small Nuclear RibonucleoProtein N | NM_033174     | Forward: CCGCAGTGTCCGAGTCTGTT<br>Reverse: CTCATGCCCTGTAGCACATAGG   | 94                 |
| Snord64     | C/D box Small Nucleolar RNA 64    | NR_028529     | Forward: ACTTATGATGAGCTATGTTTACTG<br>Reverse: CTTCAGAGTAATCATTGAGC | 62                 |

| Used symbol | Name                                      | Probe sequences for Northern Blot analysis |
|-------------|-------------------------------------------|--------------------------------------------|
| Snord116    | C/D box Small nucleolar RNA 116 (MBII-85) | Reverse: ACCTCAGTTCCGATGAGAGT              |
| Snord64     | C/D box Small Nucleolar RNA 64 (MBII-13)  | Reverse: CTTCAGAGTAATCATTGAGC              |
| Snord115    | C/D box small nucleolar RNA 115 (MBII-52) | Reverse: GCCTCAGCGTAATCCTATTGA             |

| Used symbol | Name                   | RNA Probe sequences for in situ hybridization                                                                                                                                                                                                                                                                                                                            |
|-------------|------------------------|--------------------------------------------------------------------------------------------------------------------------------------------------------------------------------------------------------------------------------------------------------------------------------------------------------------------------------------------------------------------------|
| Snord116 AS | MBII85 AS probe RNA    | GGGUCGACCUCAGUUCGGAUGAGAGUGGCGGUACAG<br>AGUUUUCACUCAUUUUGUUCAGCUUUUCCAAGGAU<br>GUUUGACUGGGAUCAUCAUAGAUCG                                                                                                                                                                                                                                                                 |
| Snord116 S  | MBII85 sense probe RNA | GGGAUCCGAUCUAUGAUGAUUCCAGUCAAAACAUUC<br>CUUGGAAAAGCUGAACAAAUGAGUGAAAACUCUGUA<br>CCGCCACUCUCAUCGGAACUGAGG                                                                                                                                                                                                                                                                 |
| eGFP AS     | eGFP AS probe RNA      | GGGAACAAAAGCUGGGUACCGGGCCCCCCCUCGAGG<br>UCGACGGUAUCGAUAAGCUUGAUGCCCAAGAAGAAAC<br>GCAAAGUGGGAAGCAUGGUGAGCAAGGGCGAGGAGC<br>UGUUCACCGGGGUGGUGCCAUCCUGGUCGAGCUG<br>GACGGCGACGUAACGGCCACAAGUUCAGCGUGUCC<br>GGCGAGGGCGAGGGCGAUGCCACCUACGGCAAGCUG<br>ACCCUGAAGUUCAUUCGACACCACCGCAAGCUGCCC<br>GUGCCCUGGCCACCCUCUGACACCUCUACCUAC<br>GGCGUGCAGUGCUUCAGCCGCUACCCCGACCACAUG<br>CGGGG |
| eGFP S      | eGFP sense probe RNA   | GGGAACAAAAGCUGGGUACCGGGCCCCCCCUCGAGG<br>UCGACGGUAUCGAUAAGCUUGAUGCCCAAGAAGAAAC<br>GCAAAGUGGGAAGCAUGGUGAGCAAGGGCGAGGAGC<br>UGUUCACCGGGGUGGUGCCAUCCUGGUCGAGCUG<br>GACGGCGACGUAACGGCCACAAGUUCAGCGUGUCC<br>GGCGAGGGCGAGGGCGAUGCCACCUACGGCAAGCUG<br>ACCCUGAAGUUCAUUCGACACCACCGCAAGCUGCCC<br>GUGCCCUGGCCACCCUCUGACACCUCUACCUAC<br>GGCGUGCAGUGCUUCAGCCGCUACCCCGACCACAUG<br>CGGGG |

AAGCAGCAGGACUUCUUAAGUCCGCCAUGCCCGAA  
GGCUACGUCCAGGAGCGCACCAUCUUCUUAAGGAC  
GACGGCAACUACAAGACCCGCGCCGAGGUGAAGUUC  
GAGGGCGACACCCUGGUGAACCGCAUCGAGCUGAAG  
GGCAUCGACUUAAGGAGGACGGCAACAUCUGGGG  
CACAAGCUGGAGUACAACUACAACAGCCACAACGUCU  
AUUAUCAUGGCCGACAAGCAGAAGAACGGCAUCAAGGU  
GAACUUCAGAUCGCCACAACAUCGAGGACGGCAG  
CGUGCAGCUCGCCGACCACUACCAGCAGAACACCCC  
CAUCGGCGACGGCCCCGUGCUGCUGCCCGACAACCA  
CUACCUGAGCACCCAGUCCGCCUGAGCAAAGACCC  
CAACGAGAAGCGCAUCACAUGGUCCUGCUGGAGUU  
CGUGACCGCCGCCAUCGAUUCUGCAGCCCGGGG

**Supplementary Table 4. qPCR results for PWS-IC-center CpG methylation analysis.**

| <b>Sample Name</b> | <b>IC AVE Cq (tech. rep)</b> | <b>IC St. Dev (tech. rep)</b> | <b>Snord64 AVE Cq (tech. rep)</b> | <b>Snord64 St. Dev (tech. rep)</b> | <b>DCq</b> | <b>St. Dev</b> |
|--------------------|------------------------------|-------------------------------|-----------------------------------|------------------------------------|------------|----------------|
| WT1_SacII          | 24.570                       | 0.046                         | 23.730                            | 0.062                              | -0.840     | 0.039          |
| WT2_SacII          | 24.073                       | 0.023                         | 23.140                            | 0.036                              | -0.933     | 0.021          |
| WT3_SacII          | 23.943                       | 0.067                         | 23.123                            | 0.040                              | -0.820     | 0.039          |
| WT4_SacII          | 23.893                       | 0.023                         | 23.033                            | 0.006                              | -0.860     | 0.012          |
| WT5_SacII          | 24.217                       | 0.023                         | 23.300                            | 0.030                              | -0.917     | 0.019          |
| WT6_SacII          | 23.827                       | 0.006                         | 22.917                            | 0.023                              | -0.910     | 0.012          |
| WT1_Uncut          | 23.580                       | 0.050                         | 23.683                            | 0.042                              | 0.103      | 0.033          |
| WT2_Uncut          | 22.627                       | 0.038                         | 22.763                            | 0.104                              | 0.137      | 0.055          |
| WT3_Uncut          | 22.997                       | 0.021                         | 23.107                            | 0.047                              | 0.110      | 0.026          |
| WT4_Uncut          | 23.117                       | 0.038                         | 23.313                            | 0.222                              | 0.197      | 0.113          |
| WT5_Uncut          | 23.113                       | 0.032                         | 23.170                            | 0.017                              | 0.057      | 0.018          |
| WT6_Uncut          | 22.667                       | 0.046                         | 22.807                            | 0.047                              | 0.140      | 0.033          |
| KO1_SacII          | 23.957                       | 0.025                         | 23.133                            | 0.065                              | -0.823     | 0.035          |
| KO2_SacII          | 24.383                       | 0.067                         | 23.573                            | 0.035                              | -0.810     | 0.038          |
| KO3_SacII          | 24.063                       | 0.015                         | 23.447                            | 0.126                              | -0.617     | 0.063          |
| KO4_SacII          | 23.567                       | 0.055                         | 22.690                            | 0.010                              | -0.877     | 0.028          |
| KO5_SacII          | 26.287                       | 0.273                         | 25.823                            | 0.015                              | -0.463     | 0.137          |
| KO6_SacII          | 23.087                       | 0.057                         | 22.270                            | 0.053                              | -0.817     | 0.039          |

|           |        |       |        |       |       |       |
|-----------|--------|-------|--------|-------|-------|-------|
| KO1_Uncut | 22.950 | 0.044 | 22.993 | 0.105 | 0.043 | 0.057 |
| KO2_Uncut | 23.497 | 0.064 | 23.717 | 0.015 | 0.220 | 0.033 |
| KO3_Uncut | 23.207 | 0.029 | 23.537 | 0.021 | 0.330 | 0.018 |
| KO4_Uncut | 22.623 | 0.067 | 22.787 | 0.031 | 0.163 | 0.037 |
| KO5_Uncut | 25.610 | 0.046 | 25.947 | 0.035 | 0.337 | 0.029 |
| KO6_Uncut | 22.097 | 0.131 | 22.433 | 0.006 | 0.337 | 0.065 |

|             |        |       |        |       |        |       |
|-------------|--------|-------|--------|-------|--------|-------|
| LoxP1_SacII | 24.423 | 0.090 | 23.653 | 0.029 | -0.770 | 0.047 |
| LoxP2_SacII | 24.257 | 0.038 | 23.500 | 0.046 | -0.757 | 0.030 |
| LoxP3_SacII | 23.743 | 0.042 | 22.887 | 0.050 | -0.857 | 0.033 |
| LoxP4_SacII | 24.117 | 0.080 | 23.310 | 0.044 | -0.807 | 0.046 |
| LoxP5_SacII | 23.670 | 0.017 | 22.900 | 0.030 | -0.770 | 0.017 |
| LoxP6_SacII | 23.660 | 0.046 | 22.810 | 0.010 | -0.850 | 0.023 |

|             |        |       |        |       |       |       |
|-------------|--------|-------|--------|-------|-------|-------|
| LoxP1_Uncut | 23.793 | 0.055 | 23.983 | 0.025 | 0.190 | 0.030 |
| LoxP2_Uncut | 23.120 | 0.030 | 23.463 | 0.021 | 0.343 | 0.018 |
| LoxP3_Uncut | 22.863 | 0.031 | 22.947 | 0.035 | 0.083 | 0.023 |
| LoxP4_Uncut | 22.477 | 0.006 | 22.647 | 0.084 | 0.170 | 0.042 |
| LoxP5_Uncut | 22.237 | 0.025 | 22.560 | 0.026 | 0.323 | 0.018 |
| LoxP6_Uncut | 22.737 | 0.023 | 22.947 | 0.045 | 0.210 | 0.025 |
